**Methods:** A survey of 60 newly formed stoma patients focused on mobile application support. A systematic search, following the PRISMA checklist, determined the use of mobile applications in supporting stoma patients. A comprehensive search of mobile applications on IOS and Android stores was performed.

**Results:** 79% of patients under 70 years old, and 58% of patients over 70, were interested in using a mobile application. 45 patients wanted an application that could photograph their output. Output and soft tissue management were the most cited reasons for contacting the stoma care nurse. The literature search yielded 196 publications; 4 studies met the eligibility criteria. One study found self-efficacy of stoma care improved after the app-based intervention. One stoma mobile application met the inclusion criteria: 'Ostobuddy osto companion'; features include measurement of output volume, photography and diary keeping. 21 fluid intake applications included features to customise water input and record fluid history.

**Conclusion:** Mobile applications can ease strain on services whilst improving care. This study indicates, a mobile application including a stoma output diary and photography would be well received by patients and could improve self-efficacy and care of the stoma.

P137

### Virtual support for the newly formed stoma

Francesca Wright Miss, Natasha Alford Miss, Sophie McDonald, Michael Okocha

North Bristol Trust NHS

Corresponding Author: Miss Francesca Wright (fw16339@bristol.ac.uk)

**Background:** 214 stomas were created between January 2019 and January 2020 at our Tertiary Colorectal Centre. We surveyed patients to identify desirable features for a mobile stoma support application to mitigate potential challenges of limited in-person review.

**Objective:** The aim is three-fold: To survey stoma patients, identify literature on mobile applications supporting stoma patients and evaluate available stoma support applications.
